# Supplementary material for: Modelling feedbacks between the Northern Hemisphere ice sheets and climate during the last glacial cycle
Source: Copernicus journal article supplement (doi:10.5194/cp-19-399-2023), 2023-02-08
Supplement: Supplementary file 1 [file cp-19-399-2023-supplement.pdf]

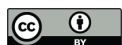

*Supplement of*

**Modelling feedbacks between the Northern Hemisphere ice sheets and climate during the last glacial cycle**

**Meike D. W. Scherrenberg et al.**

*Correspondence to:* Meike D. W. Scherrenberg (m.d.w.scherrenberg@uu.nl)

The copyright of individual parts of the supplement might differ from the article licence.

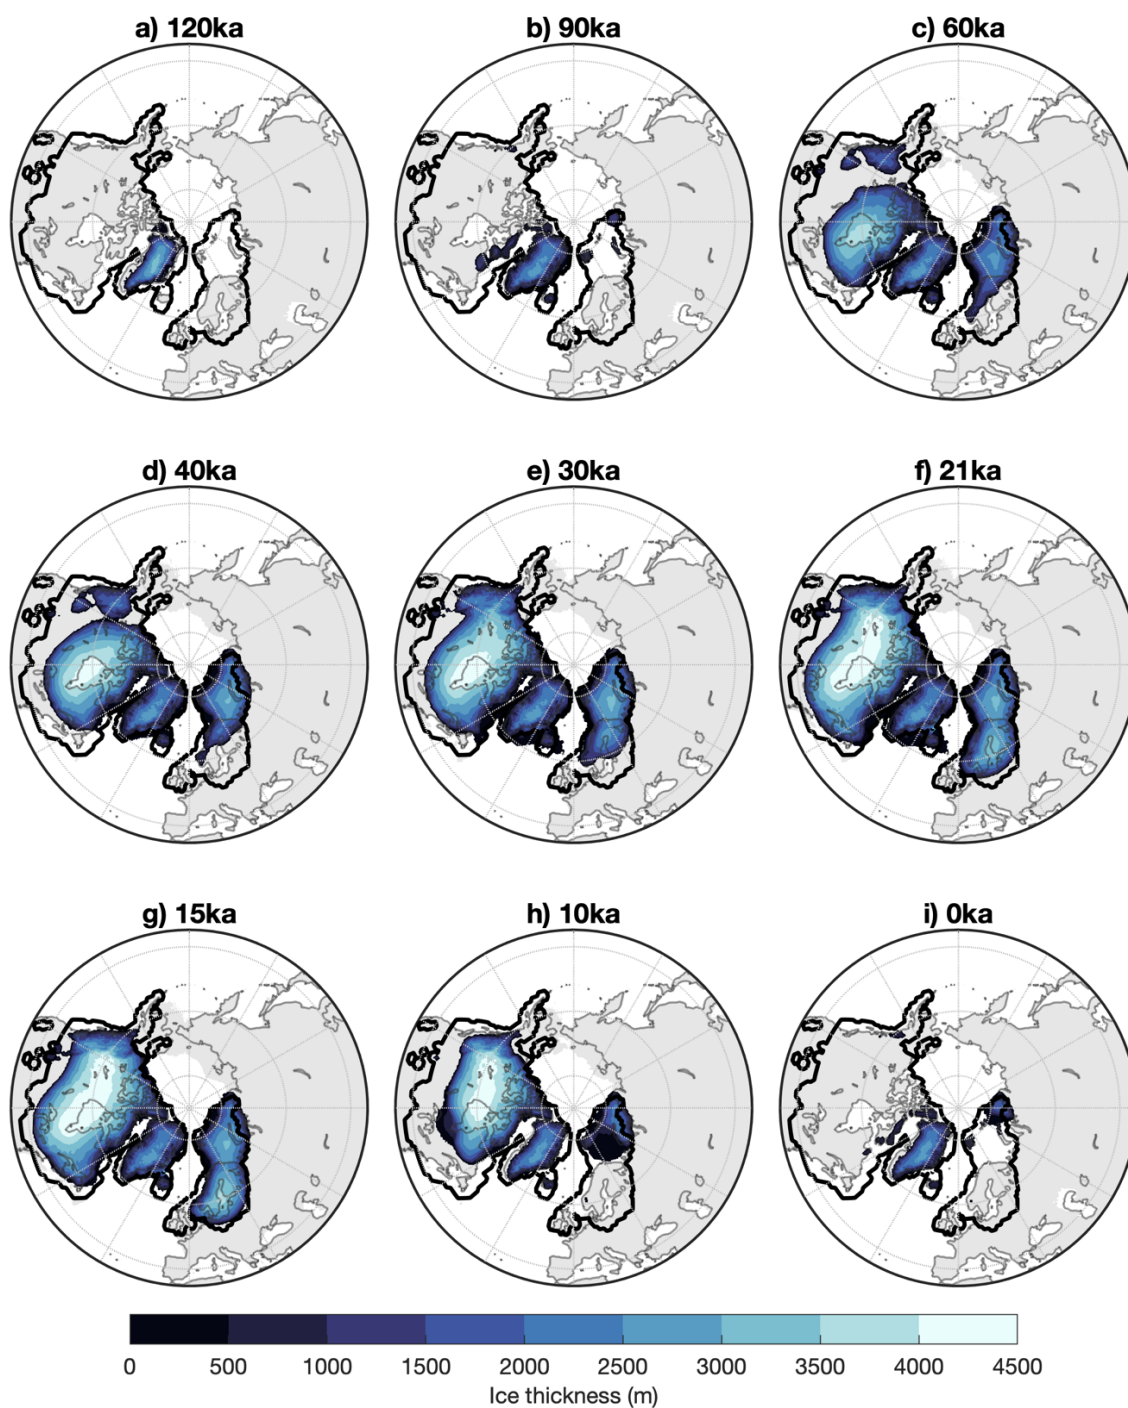

**Figure S1.** Ice thickness evolution when using the climate matrix method with PMIP3-Ensemble climate. The black contours represent the margin of the Last Glacial Maximum (LGM) reconstruction by Abe-Ouchi et al. (2015).

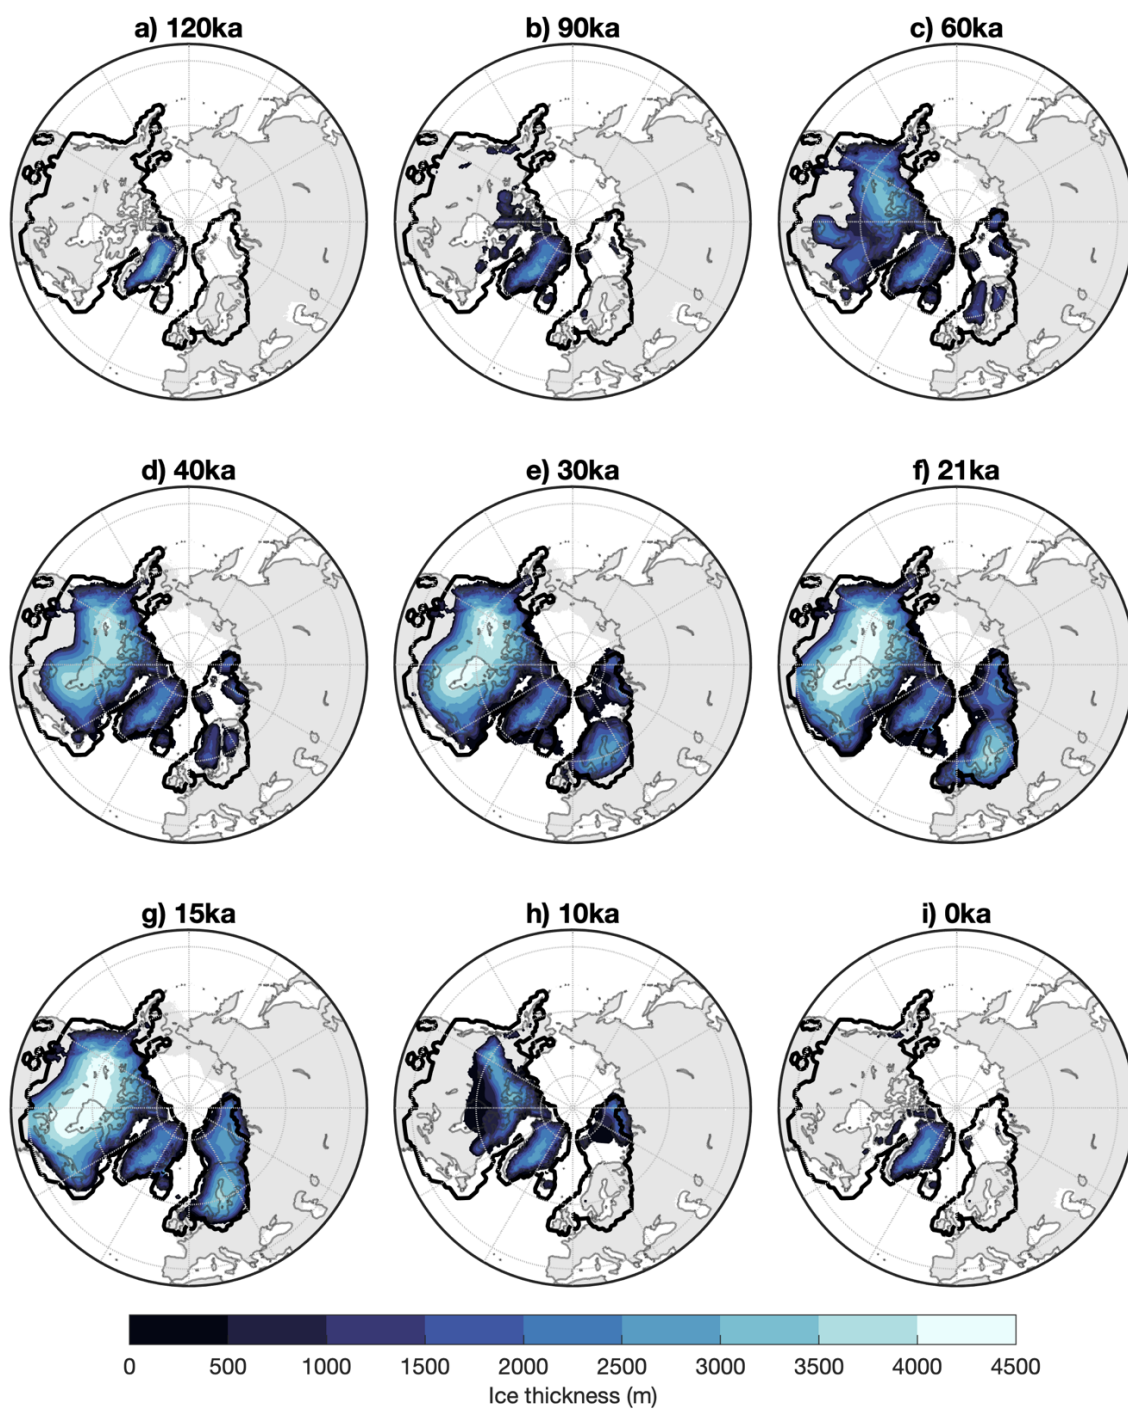

5 **Figure S2.** Evolution of ice thickness when using the glacial index method with PMIP3-Ensemble climate. The black contours represent the margins of the LGM ice sheet reconstruction by Abe-Ouchi et al. (2015).

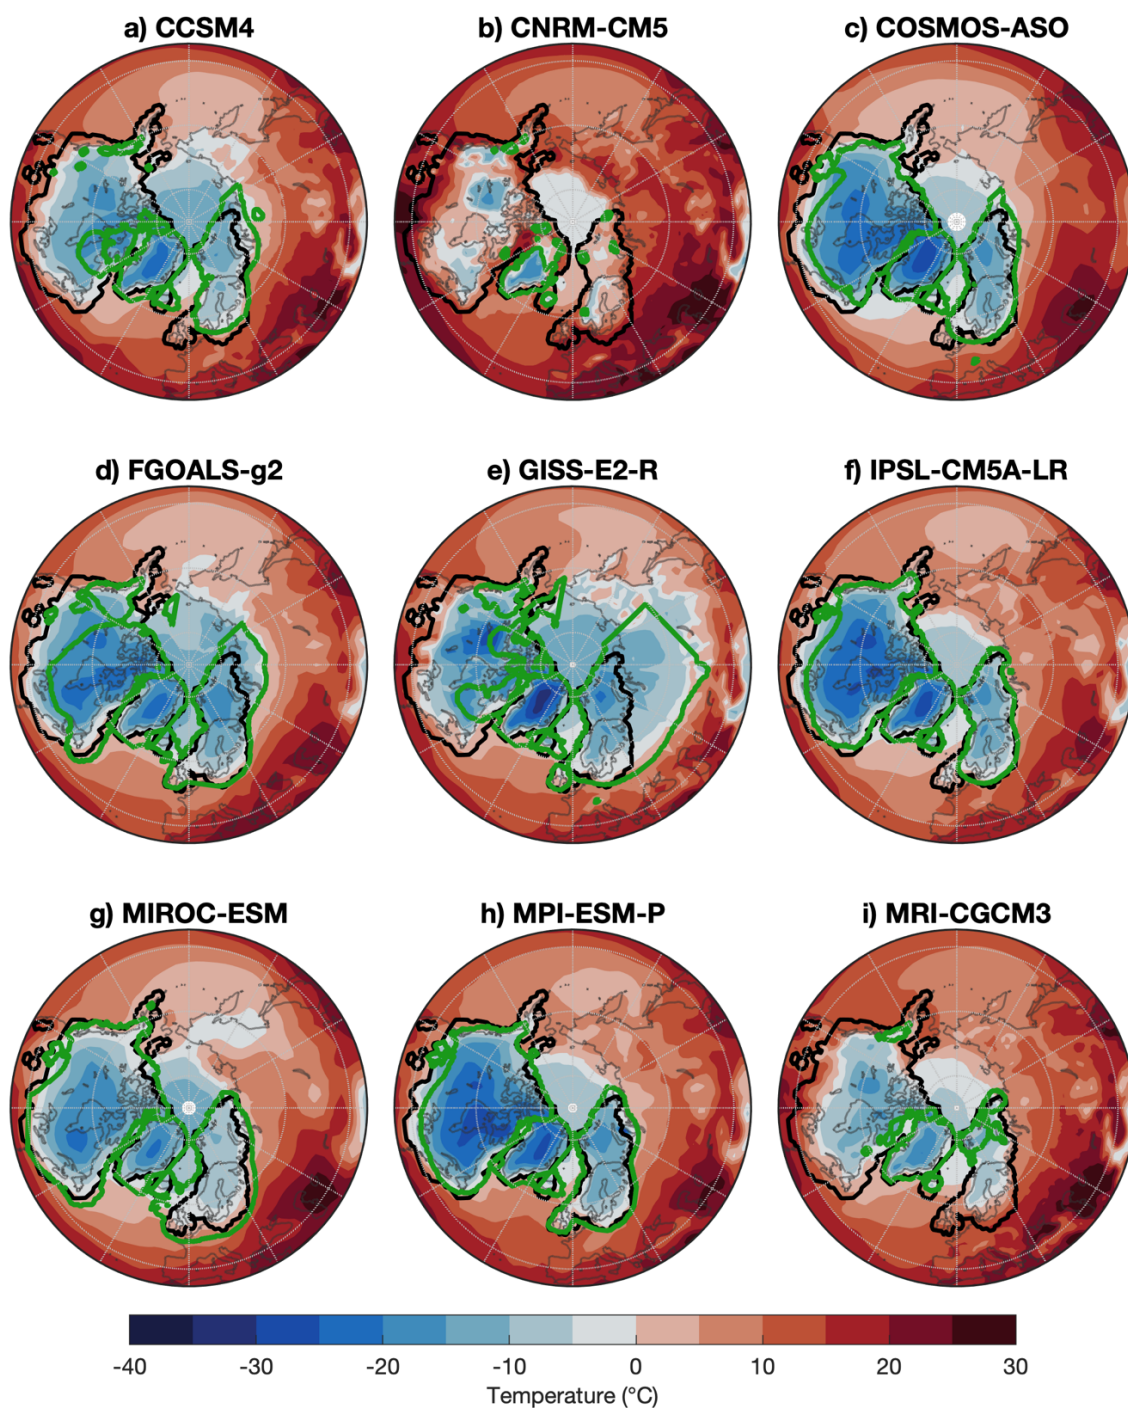

**Figure S3:** Last glacial maximum (LGM) summer (June, July, August) temperature for each general circulation model in the paleoclimate modelling intercomparison project phase 3. Black contours represent the Abe-Ouchi et al. (2015) LGM ice sheet reconstruction. The green contours show the extent of the LGM ice sheets in the preliminary simulations.
